# Supplementary material for: Associations between Serum Interleukins (IL-1β, IL-2, IL-4, IL-6, IL-8, and IL-10) and Disease Severity of COVID-19: A Systematic Review and Meta-Analysis
Source: PubMed Central journal article supplement (PMC9079324; doi:10.1155/2022/2755246), 2022-04-30

**A** IL-2  
Severe versus non-severe patients

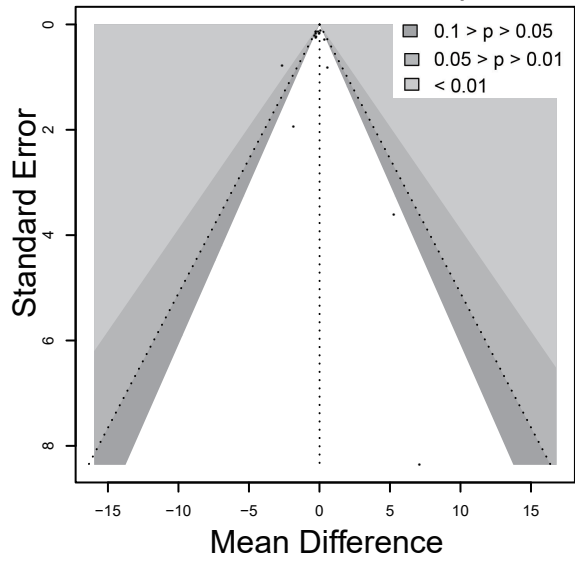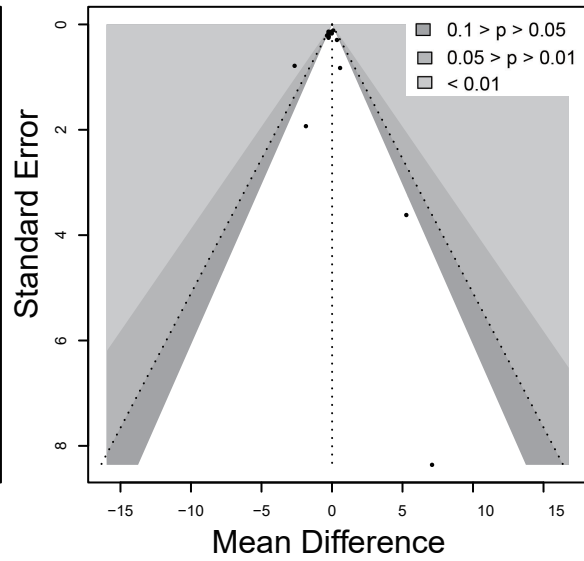

**B** IL-4  
Severe versus non-severe patients

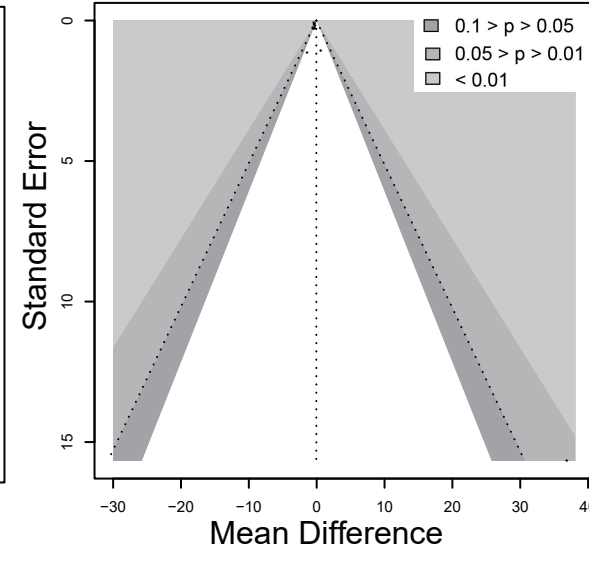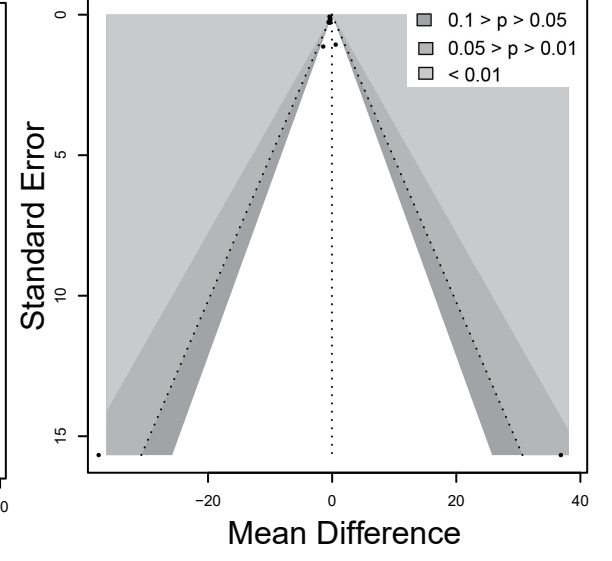

**C** IL-6  
Severe versus non-severe patients

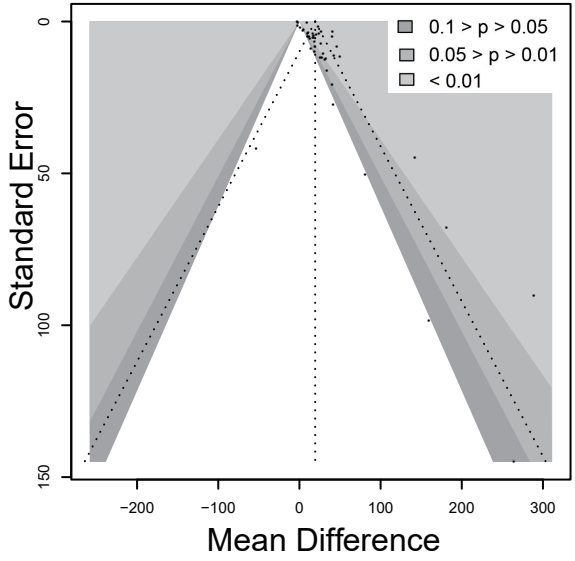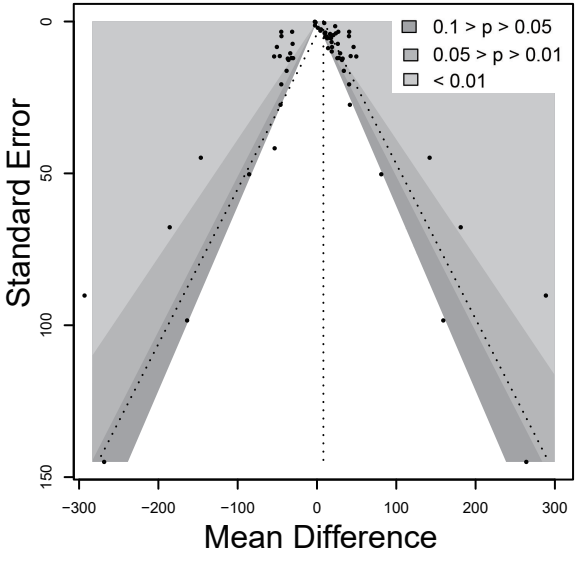

**D** IL-6  
ICU versus non-ICU patients

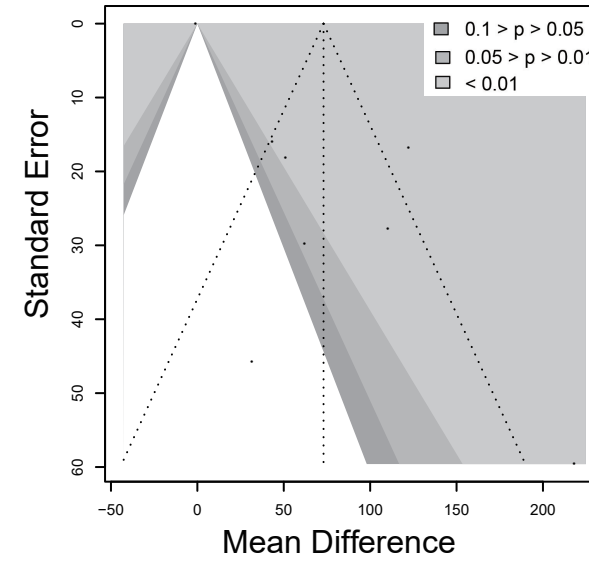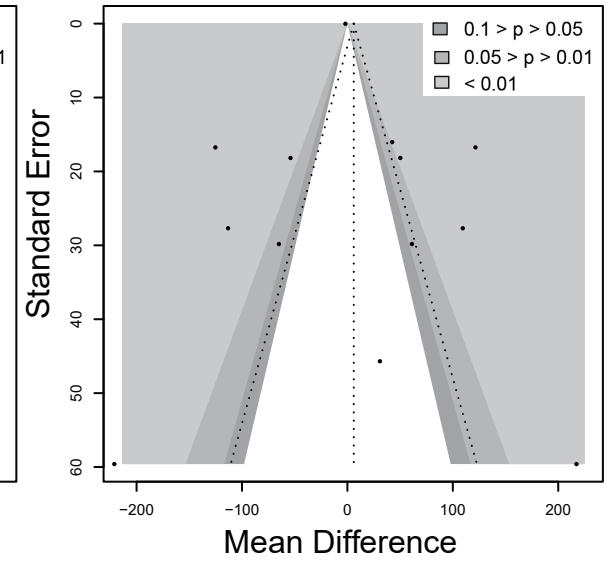

**E** IL-6  
Non-survivor versus survivor patients

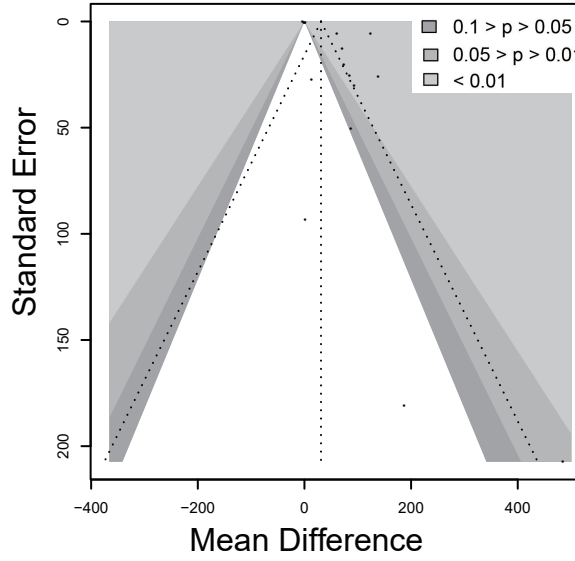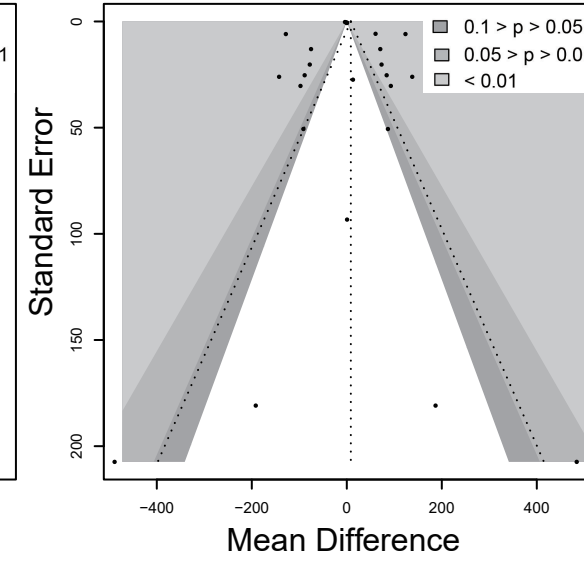

**F** IL-8  
Severe versus non-severe patients

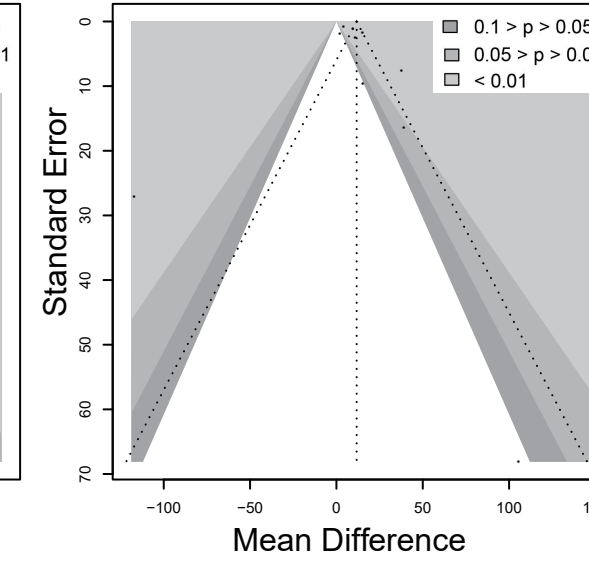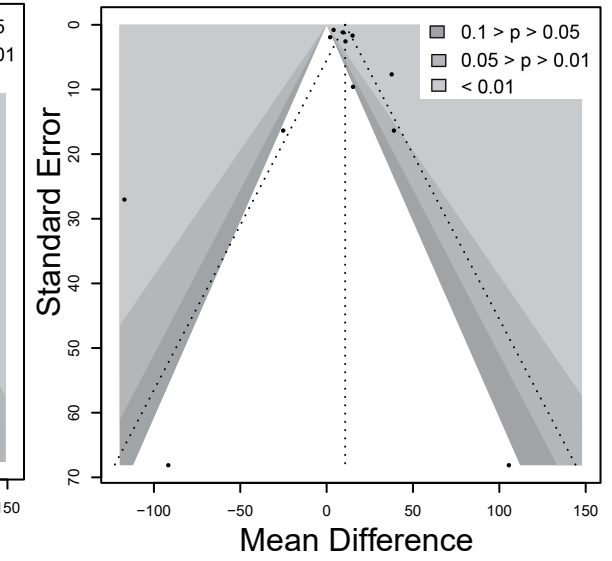

**G** IL-8  
Non-survivor versus survivor patients

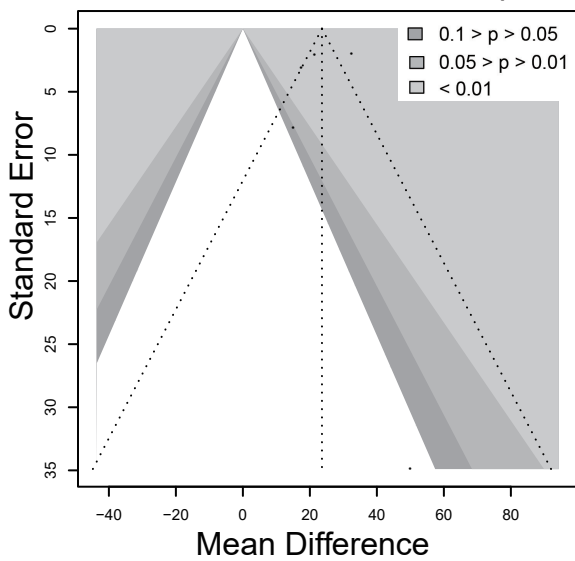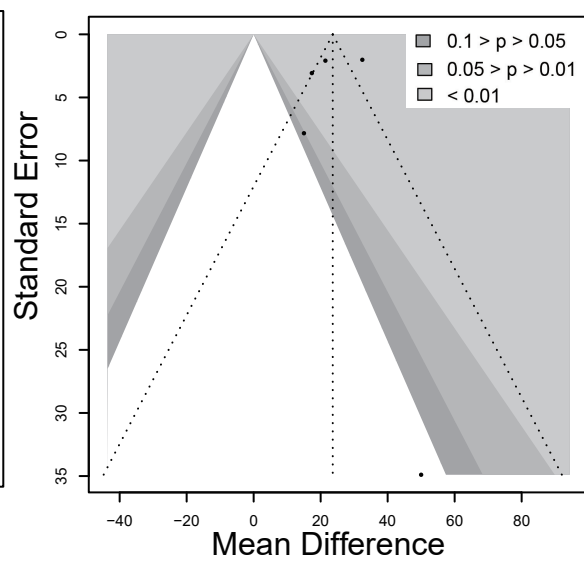

**H** IL-10  
Severe versus non-severe patients

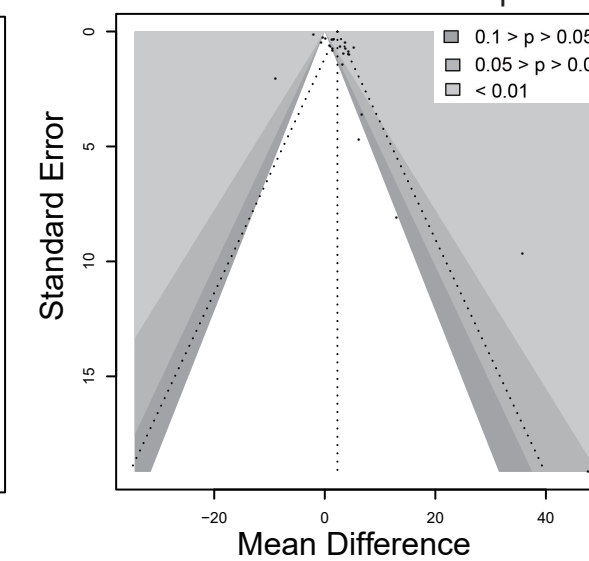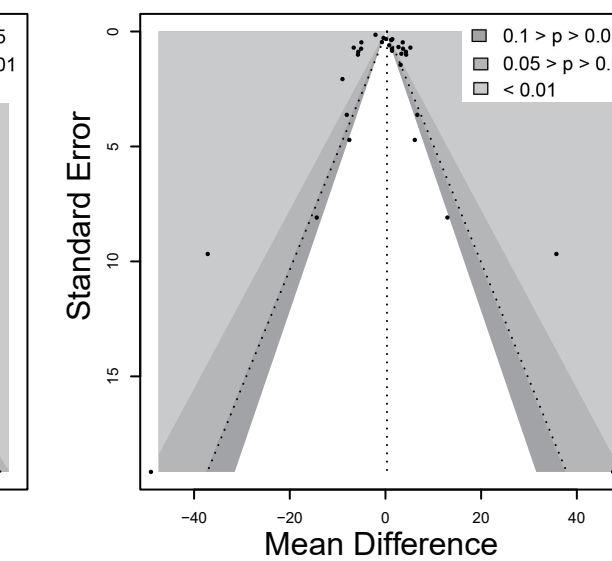

Supplement: 2755246.f1.pdf [file 2755246.f1.pdf]
